# Supplementary material for: Assessing the functional association of intronic miRNAs with their host genes
Source: PubMed Central journal article supplement — RNA. 2018 Aug;24(8):991–1004. doi: 10.1261/rna.064386.117 (PMC6049507; doi:10.1261/rna.064386.117), 2018-08
Supplement: supp_064386.117_Supplemental_FigS1.pdf [file supp_064386.117_Supplemental_FigS1.pdf]

**A**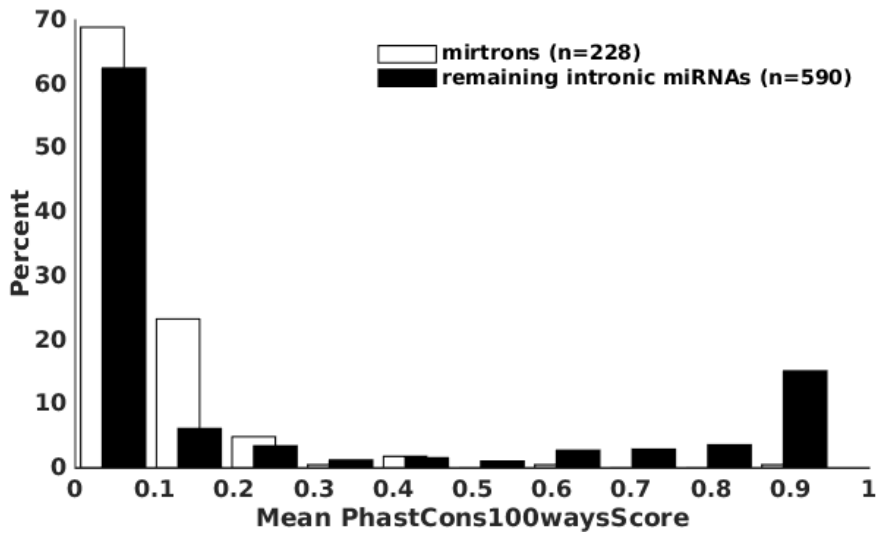**B**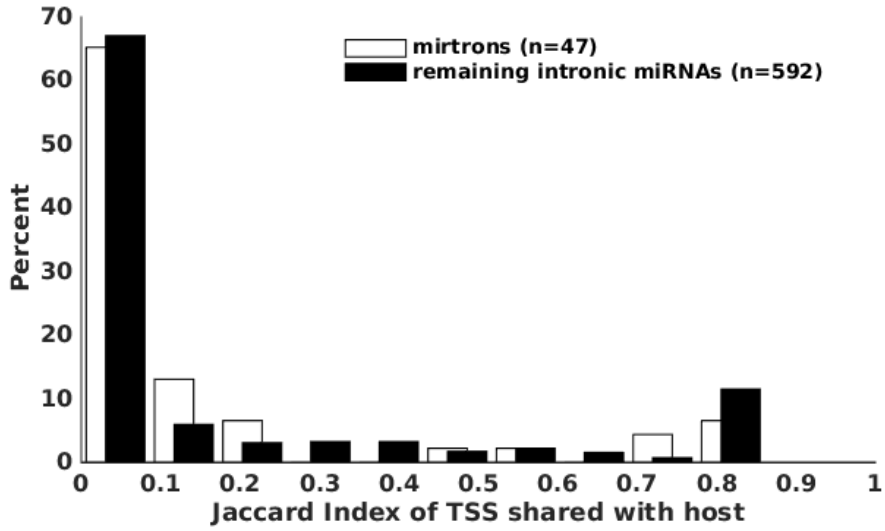**C**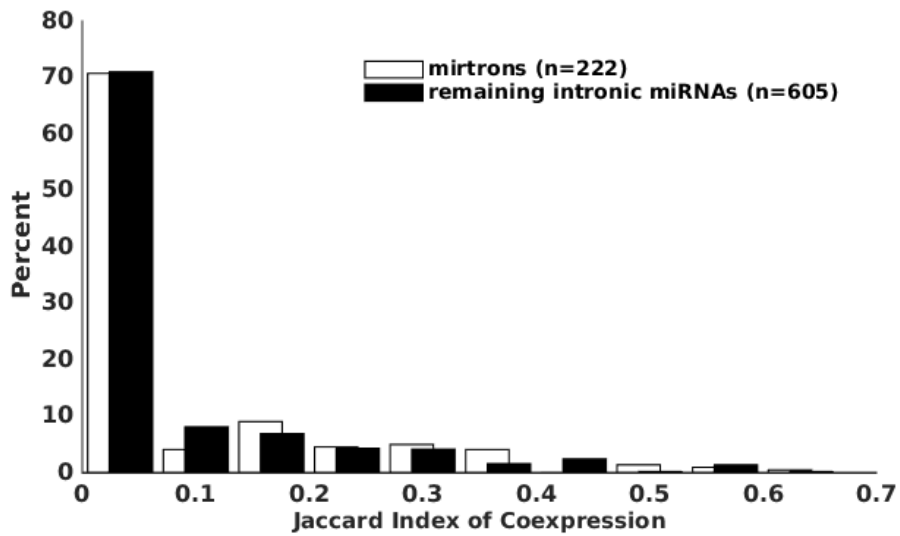

**Figure S1: Comparison of mirtrons and other intronic miRNAs in the studied properties.** 235/866

intronic pre-miRNAs were defined as mirtrons based on the paper by Wen et al. (PLoS Comp Biol., 2015). Since data for the various properties were not available for all intronic miRNAs and mirtrons, the total number of intronic miRNAs and mirtrons differs between the analyses (A-C). A. Mirtrons (white bars) are less conserved than the remaining intronic miRNAs (black bars; Wilcoxon Rank Sum test  $p \leq 8.671 \times 10^{-4}$ ). B. Distribution of the Jaccard index of host dependent TSSs for mirtrons (white bars) is similar to that of the remaining intronic miRNAs (black bars; Wilcoxon Rank Sum Test  $p \leq 0.8286$ ). C. Distribution of Jaccard index of coexpression of mirtrons (white bars) is similar to that of remaining intronic miRNAs (black bars; Wilcoxon Rank Sum Test  $p \leq 0.8297$ ).
