# Supplementary material for: Assessing the functional association of intronic miRNAs with their host genes
Source: PubMed Central journal article supplement — RNA. 2018 Aug;24(8):991–1004. doi: 10.1261/rna.064386.117 (PMC6049507; doi:10.1261/rna.064386.117), 2018-08
Supplement: supp_064386.117_Supplemental_FigS2.pdf [file supp_064386.117_Supplemental_FigS2.pdf]

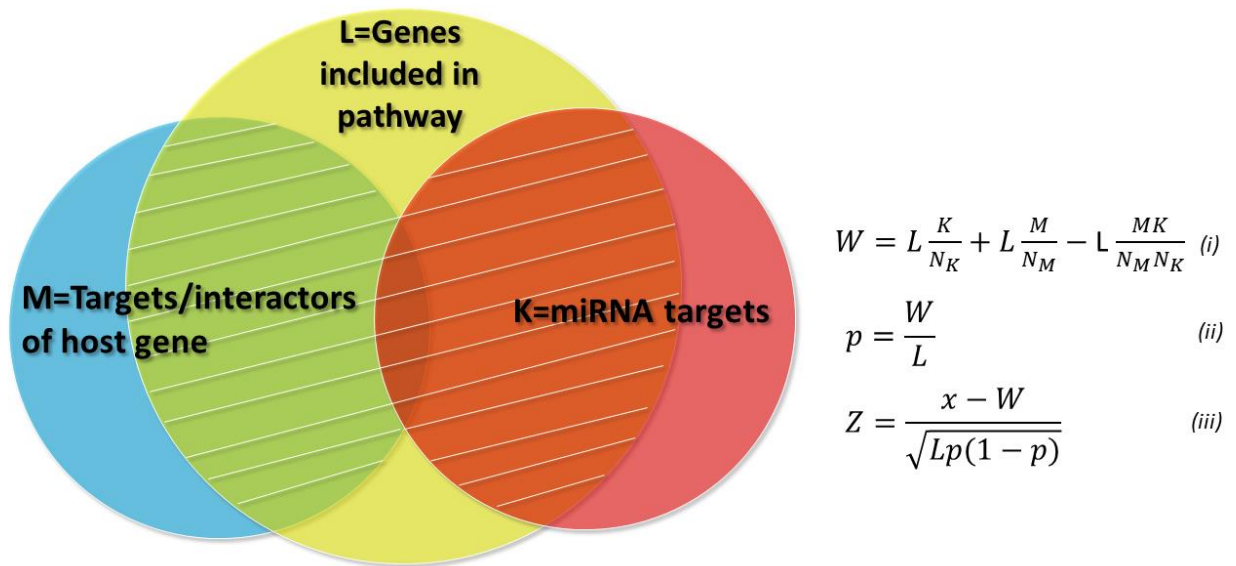

**Figure S2: Determining the statistical significance of an intronic miRNA's targets participating in a pathway together with its host gene targets**

For each shared pathway of a transcription factor host gene and its intronic miRNA, the number of expected miRNA targets and host targets both randomly participating in a specific pathway ( $W$ ; striped section) was calculated.  $L$  is the number of genes included in the pathway according to the KEGG database(1);  $K$  are the number of miRNA targets participating in the specific pathway,  $N_K$  are the total number of intronic miRNA targets in the CLASH data ( $N_K = 3929$ )(2);  $M$  are the total number of protein targets in the specific pathway according to the Trrust database(1), and  $N_M$  are the total number of host Targets in the Trrust database ( $N_M = 368$ )(3). Next the Z test approximation of the Binomial Distribution is calculated according to equation (iii) by subtracting the observed number of miRNA targets and host targets/interactors participating in the pathway ( $x$ ) from the expected ( $W$ ) and dividing by the standard deviation  $\sqrt{np(1 - p)}$ .

## References

1. Kanehisa, M., Sato, Y., Kawashima, M., Furumichi, M. and Tanabe, M. (2016) KEGG as a reference resource for gene and protein annotation. *Nucleic acids research*, **44**, D457-462.
2. Helwak, A., Kudla, G., Dudnakova, T. and Tollervey, D. (2013) Mapping the human miRNA interactome by CLASH reveals frequent noncanonical binding. *Cell*, **153**, 654-665.
3. Han, H., Shim, H., Shin, D., Shim, J.E., Ko, Y., Shin, J., Kim, H., Cho, A., Kim, E., Lee, T. *et al.* (2015) TRRUST: a reference database of human transcriptional regulatory interactions. *Scientific reports*, **5**, 11432.
