# Supplementary material for: Assessing the functional association of intronic miRNAs with their host genes
Source: PubMed Central journal article supplement — RNA. 2018 Aug;24(8):991–1004. doi: 10.1261/rna.064386.117 (PMC6049507; doi:10.1261/rna.064386.117), 2018-08
Supplement: supp_064386.117_Supplemental_Table_S2.pdf [file supp_064386.117_Supplemental_Table_S2.pdf]

**Supplemental Table S2:** Data used to compute the statistical significance of number of pathways in which both targets of an intronic miRNA and the host protein participate. Statistical significance of common pathways ( $k$ ) was computed for each host-miRNA pair pathway by cumulative hypergeometric distribution that took into account the number of pathways that the host participates in ( $K$ ), as well as the number of pathways the intronic miRNA's targets participate in ( $n$ ), in reference to the total number of pathways found in the KEGG database (Kanehisa and Goto 2000) for human ( $N$ ).

| $P(X = k) = \frac{\binom{K}{k} \binom{N - K}{n - k}}{\binom{N}{n}}$ We compute $P(X \geq k)$ |         | $k$                                                                  | $K$                                           | $n$                                             | $N$                        | P value  | Adjusted P value |
|----------------------------------------------------------------------------------------------|---------|----------------------------------------------------------------------|-----------------------------------------------|-------------------------------------------------|----------------------------|----------|------------------|
|                                                                                              |         | Number of pathways common to host protein and intronic miRNA targets | Number of pathways in which host participates | Number of pathways miRNA targets participate in | All Human pathways in KEGG |          |                  |
| hsa-miR-4326                                                                                 | ARFGAP1 | 1                                                                    | 16                                            | 1                                               | 293                        | 5.46E-02 | 1.98E-01         |
| hsa-miR-326                                                                                  | ARRB1   | 4                                                                    | 86                                            | 5                                               | 293                        | 2.73E-02 | 1.98E-01         |
| hsa-miR-1301-3p                                                                              | DNMT3A  | 3                                                                    | 122                                           | 3                                               | 293                        | 7.12E-02 | 1.98E-01         |
| hsa-miR-1296-5p                                                                              | JMJD1C  | 1                                                                    | 136                                           | 1                                               | 293                        | 4.64E-01 | 5.22E-01         |
| hsa-miR-744-5p                                                                               | MAP2K4  | 11                                                                   | 207                                           | 12                                              | 293                        | 8.79E-02 | 1.98E-01         |
| hsa-miR-93-5p                                                                                | MCM7    | 2                                                                    | 145                                           | 2                                               | 293                        | 2.44E-01 | 3.66E-01         |
| hsa-miR-106b-5p                                                                              | MCM7    | 1                                                                    | 92                                            | 2                                               | 293                        | 5.30E-01 | 5.30E-01         |
| hsa-miR-93-3p                                                                                | MCM7    | 2                                                                    | 167                                           | 2                                               | 293                        | 3.24E-01 | 4.17E-01         |
| hsa-miR-151a-3p                                                                              | PTK2    | 4                                                                    | 52                                            | 14                                              | 293                        | 2.23E-01 | 3.66E-01         |
